# Supplementary material for: Synthesis of crosslinked polymeric nanocapsules using catanionic vesicle templates stabilized by compressed CO2
Source: Royal Society of Chemistry journal article supplement (doi:10.1039/c5sm02075a), 2015-01-01
Supplement: c5sm02075a1.pdf [file c5sm02075a1.pdf]

**Electronic Supplementary Information**

**Synthesis of Crosslinked Polymeric Nanocapsules using  
Catanionic Vesicle Templates Stabilized by Compressed CO<sub>2</sub>**

**Siming Dong, Patrick T. Spicer, Frank P. Lucien, Per B. Zetterlund\***

*Centre for Advanced Macromolecular Design (CAMD), School of Chemical Engineering, The  
University of New South Wales, Sydney, NSW 2052, Australia*

*Tel: +61 2 9385 4331; Fax: +61 2 9385 6250; E-mail: p.zetterlund@unsw.edu.au*

\* Corresponding author

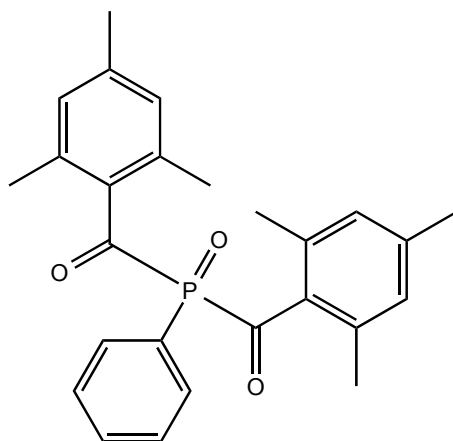

**Scheme S1.** Chemical structure of phenylbis(2,4,6-trimethylbenzoyl)phosphine oxide (Irgacure 819).

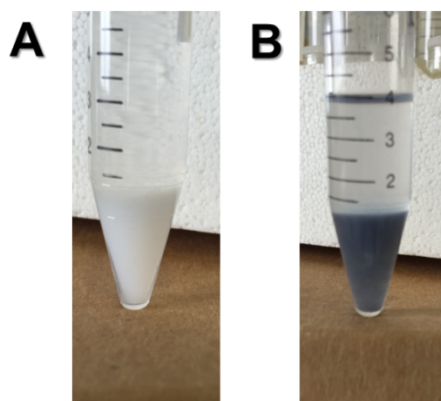

**Fig. S1.** Retention of NBA in nanocapsules; (A) blank nanocapsules after multiple washings; (B) nanocapsules with entrapped NBA after multiple washings.

Phase behavior before  
polymerization (118 wt%)

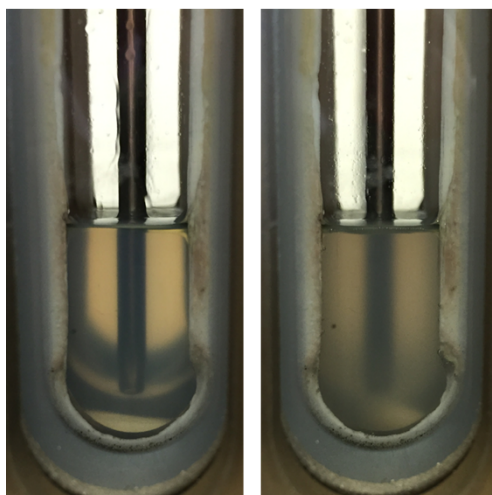

0h

4h

**Fig. S2.** Photographs of vesicle solution at 25 °C and a CO<sub>2</sub> pressure of 5.0 MPa before polymerization (Table 1, 118 wt% monomer rel. to total surfactant)

**A** Phase behavior before polymerization  
(47 wt% 3.5 MPa CO<sub>2</sub>)

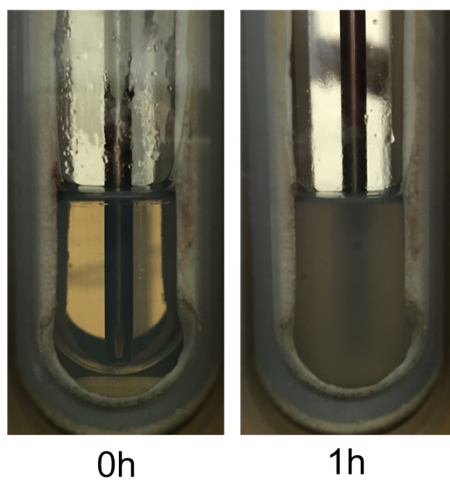

**B**

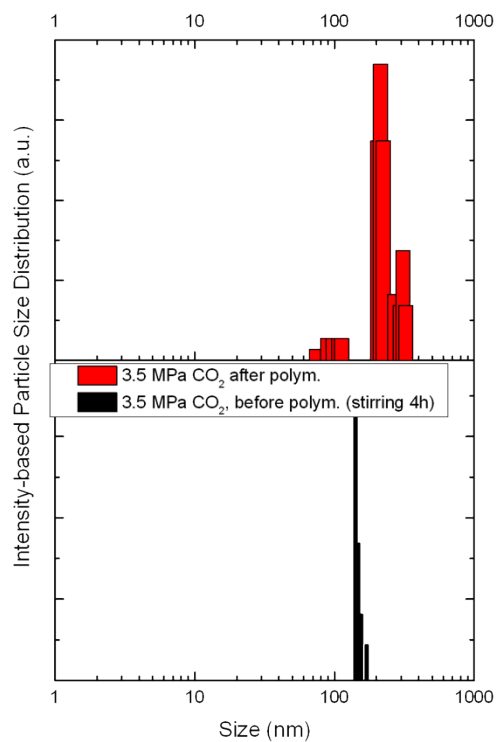

**Fig. S3.** Photographs of vesicle solution at 25 °C and a CO<sub>2</sub> pressure of 3.5 MPa before polymerization (A) and intensity-based size distributions before ( $d_1 \sim 147$  nm) and after polymerization ( $d_1 \sim 226$  nm) (B) (Table 1, 47 wt% monomer rel. to total surfactant).
